# Supplementary material for: Stretchable and conductive polyacrylamide/sodium alginate dual-network hydrogels mediated by HNO3 for flexible capacitors and wearable sensors
Source: Royal Society of Chemistry journal article supplement (doi:10.1039/d4nj03549f), 2024-01-01
Supplement: d4nj03549f1.pdf [file d4nj03549f1.pdf]

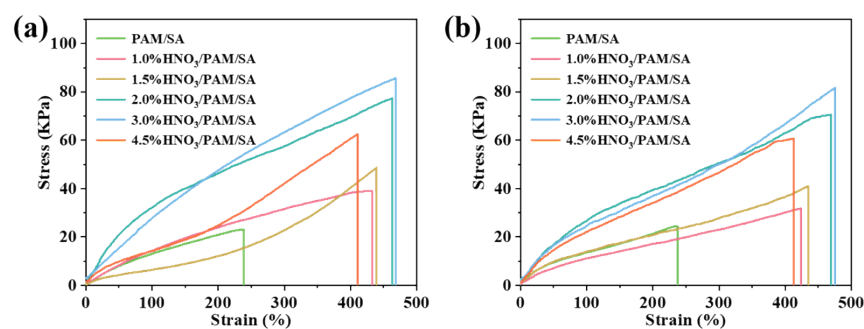

**Fig. S1.** Comparison of the maximum tensile strain of PAM/SA and 3.0HNO<sub>3</sub>/PAM/SA hydrogels.

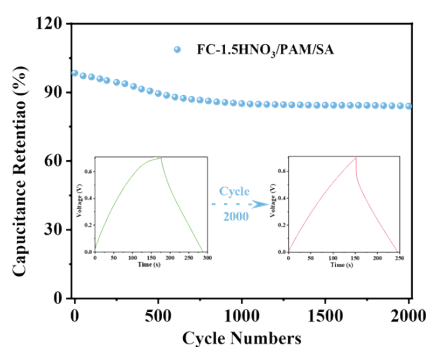

**Fig. S2.** Capacitance retention curves of FC-1.5HNO<sub>3</sub>/PAM/SA.

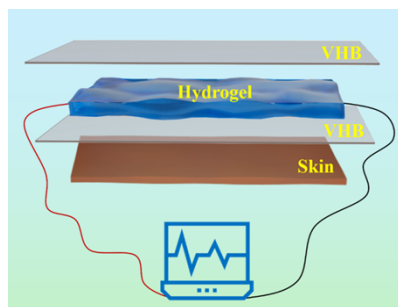

**Fig. S3.** Schematic diagram of hydrogel sensor detection system.
